# Supplementary material for: In vitro biofabrication of silver nanoparticles: Optimization, characterization, and activity against beta-lactamases-resistant Enterococcus faecalis
Source: Research Square preprint supplement (doi:10.21203/rs.3.rs-557864/v1), 2021-05-26
Supplement: Supplementary file 1 [file 6b78597503880ccdb9b88b35.docx]

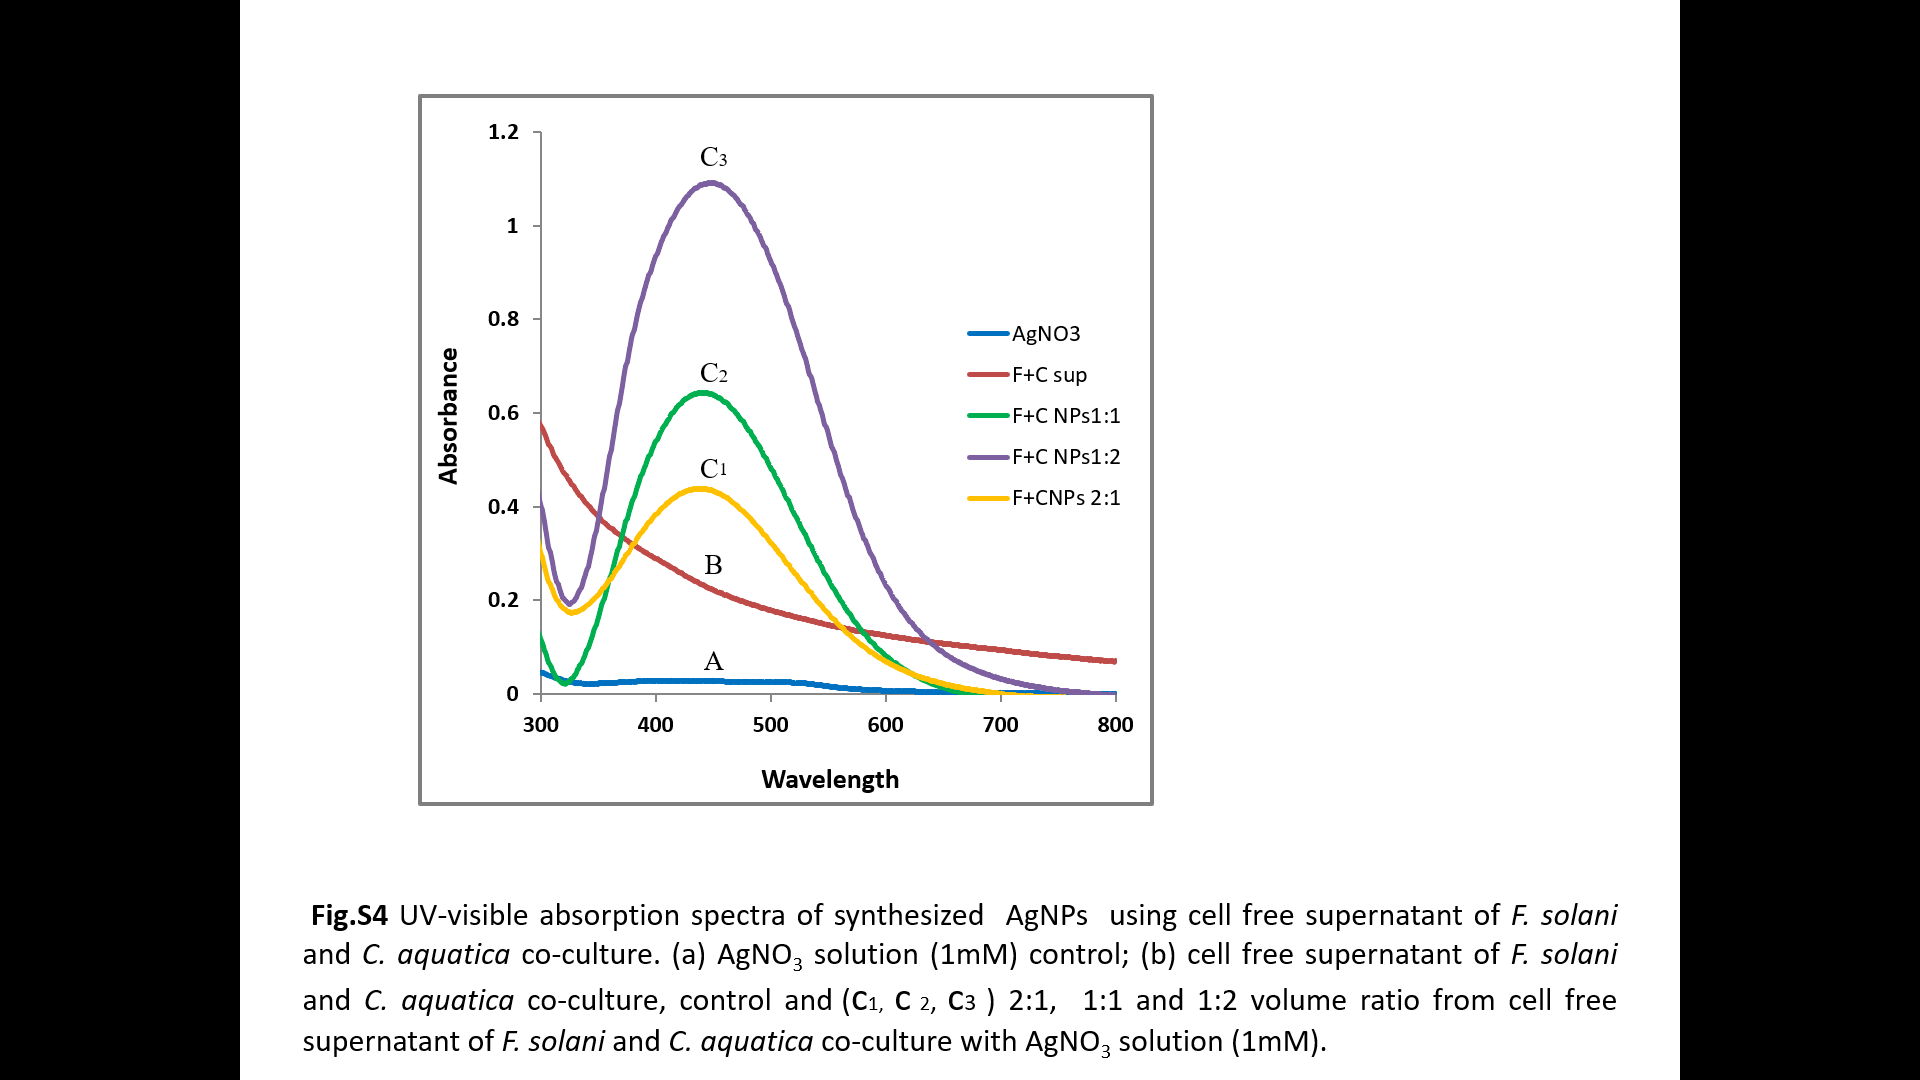


**Figure S4**. UV-visible absorption spectra of synthesized AgNPs. (A) AgNO3 solution (1mM) control; (B) C-FS, control and(C1, C2, C3) 2:1, 1:1 and 1:2 volumeratio from C-FS with AgNO3 solution (1mM).
