# Supplementary material for: In vitro biofabrication of silver nanoparticles: Optimization, characterization, and activity against beta-lactamases-resistant Enterococcus faecalis
Source: Research Square preprint supplement (doi:10.21203/rs.3.rs-557864/v1), 2021-05-26
Supplement: Supplementary file 1 [file 9eff8fd329ea9a4ba847d99f.docx]

**
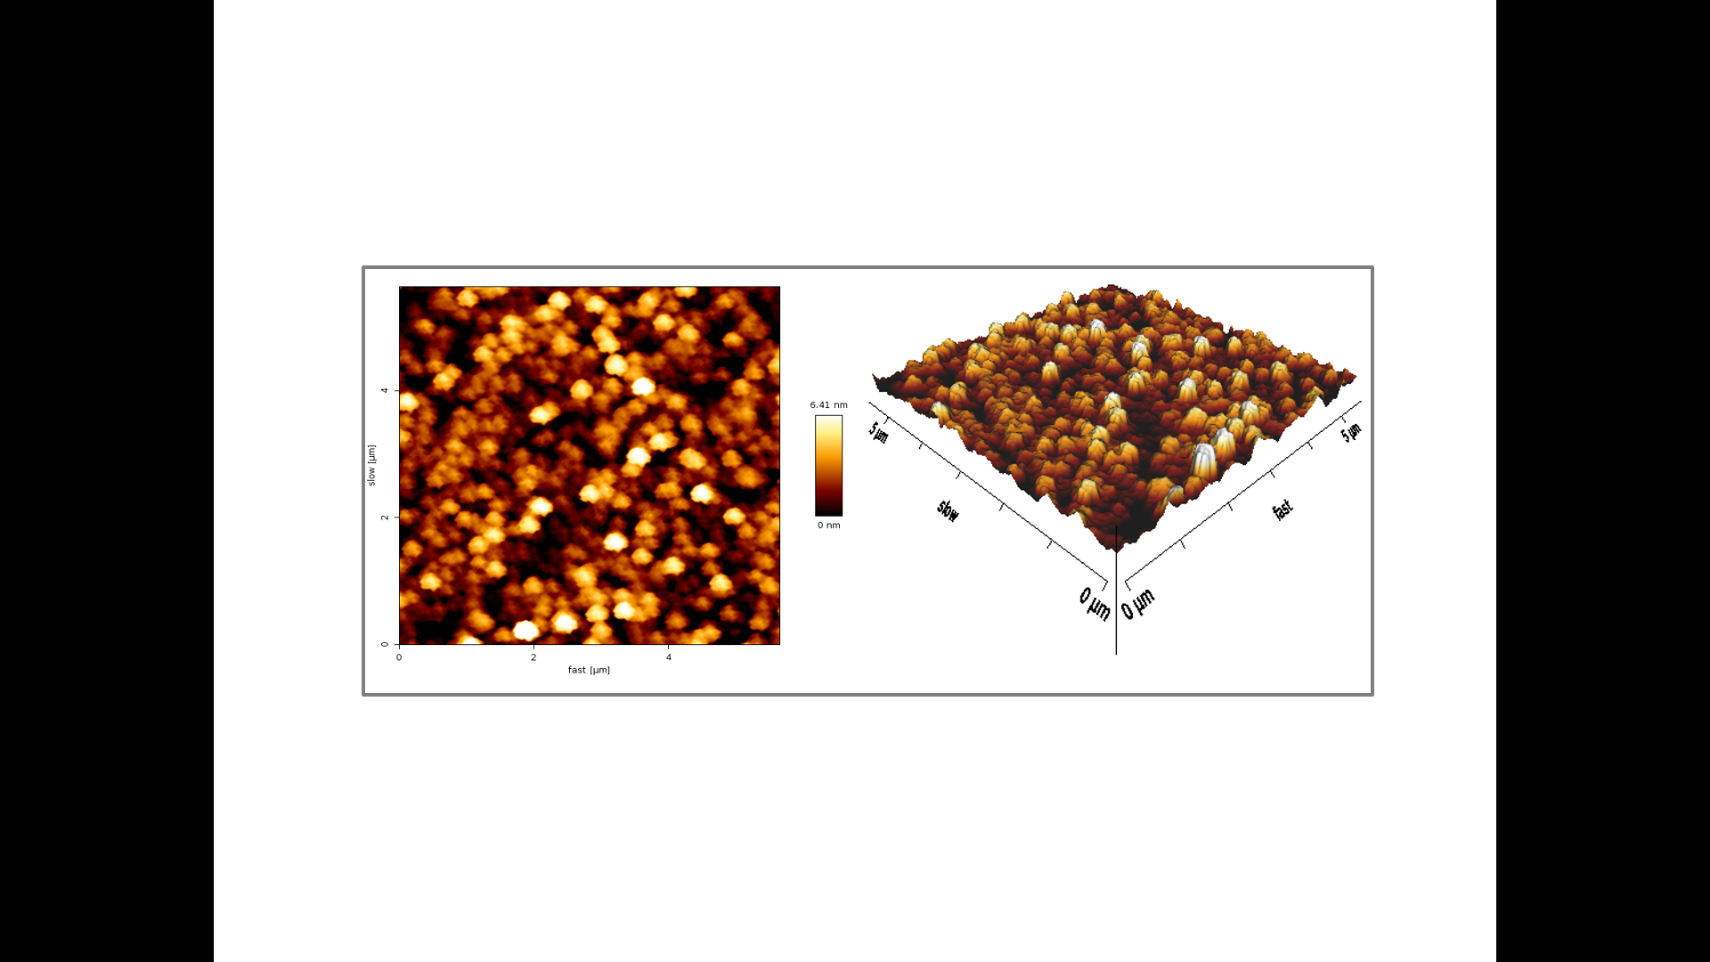
**

**Figure S7.** AFM images of AgNPs synthesized by C-FS of *F. solani* and *C. aquatica*. Left picture depicts the 2D image of the AgNPs; whereas right picture represents the 3D image.
